# Supplementary material
Source: MDPI journal article supplement (https://www.mdpi.com/1996-1073/14/6/1627)
Supplement: s1 [file s1]

## Supplementary Materials

# EU-Funded Projects with Actual Implementation of Renewable Energies in Cities. Analysis of their Concern for Aesthetic Impact

Núria Sánchez-Pantoja <sup>1,\*</sup>, Rosario Vidal <sup>1</sup> and M. Carmen Pastor <sup>2</sup>

<sup>1</sup> Department of Mechanical Engineering and Construction, GID, Universitat Jaume I, Av. Sos Baynat s/n, 12071 Castelló, Spain; [vidal@uji.es](mailto:vidal@uji.es)

<sup>2</sup> Department of Basic and Clinical Psychology, and Psychobiology, Universitat Jaume I, Av. Sos Baynat s/n, 12071 Castelló, Spain; [mpastor@uji.es](mailto:mpastor@uji.es)

\* Correspondence: [nbelengu@uji.es](mailto:nbelengu@uji.es); Tel.: +34-964729252

### SUPPLEMENTARY MATERIAL:

Short survey designed including specific questions about the project and the facilities features implemented:

Coordinator or leader of the project: \_\_\_\_\_

Period of the project: \_\_\_\_\_

Main goal of the project: \_\_\_\_\_

\_\_\_\_\_  
\_\_\_\_\_

1. Urban area affected by the project (the area that will use the energy generated by renewable resources): \_\_\_\_\_ hm<sup>2</sup>.

2. Number of inhabitants involved: \_\_\_\_\_ residents in the area.

3. Annual energy demand estimation in that area: \_\_\_\_\_ GWh.

4. Energy demand covered by renewable energies implemented (or estimation):  
\_\_\_\_\_ %

5. Public urban space occupied exclusively by energy generating installations:  
\_\_\_\_\_ m<sup>2</sup>.

6. Public urban space occupied exclusively by energy storage systems:  
\_\_\_\_\_ m<sup>2</sup>.

7. What kind of renewable energy systems has been implemented?

Thermal solar systems

PV systems

Wind energy

Biofuels

Hydroelectric power

Geothermal energy

Wave power

Others: \_\_\_\_\_

8. What kind of storage energy systems has been used?

Pumped hydro storage

Compressed air energy storage

Flywheels

Supercapacitors

Redox flow batteries

Lithium

batteries

Hydrogen storage

Others: \_\_\_\_\_

9. Generated energy or estimation: \_\_\_\_\_ GWh/year.

10. Cost of generated energy: \_\_\_\_\_ €/kWh.

11. Estimated saving for the end user: \_\_\_\_\_ %.

12. Current phase of the project as a whole: \_\_\_\_\_ being,

a) Project definition and planning

b) Systems design

c) Implementation of the systems

d) Outcome assessment

e) Finished
